# Supplementary material
Source: PubMed Central journal article supplement (PMC4145007)

## Graphical Abstract

An antibody barcode microchamber array chip permits the measurement of secreted proteins from pairs of individual tumor and macrophage cells and quantifying paracrine signaling-induced functional changes.

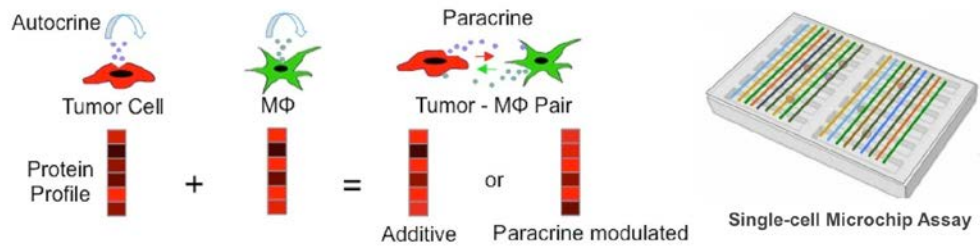

Supplement: NIHMS616436-supplement-Graphical_Abstract.pdf [file NIHMS616436-supplement-Graphical_Abstract.pdf]
